# Supplementary material for: Spontaneous Loss of Virulence in Natural Populations of Listeria monocytogenes
Source: PubMed Central journal article supplement (PMC5649026; doi:10.1128/iai.00541-17), 2017-10-18

Figure S3

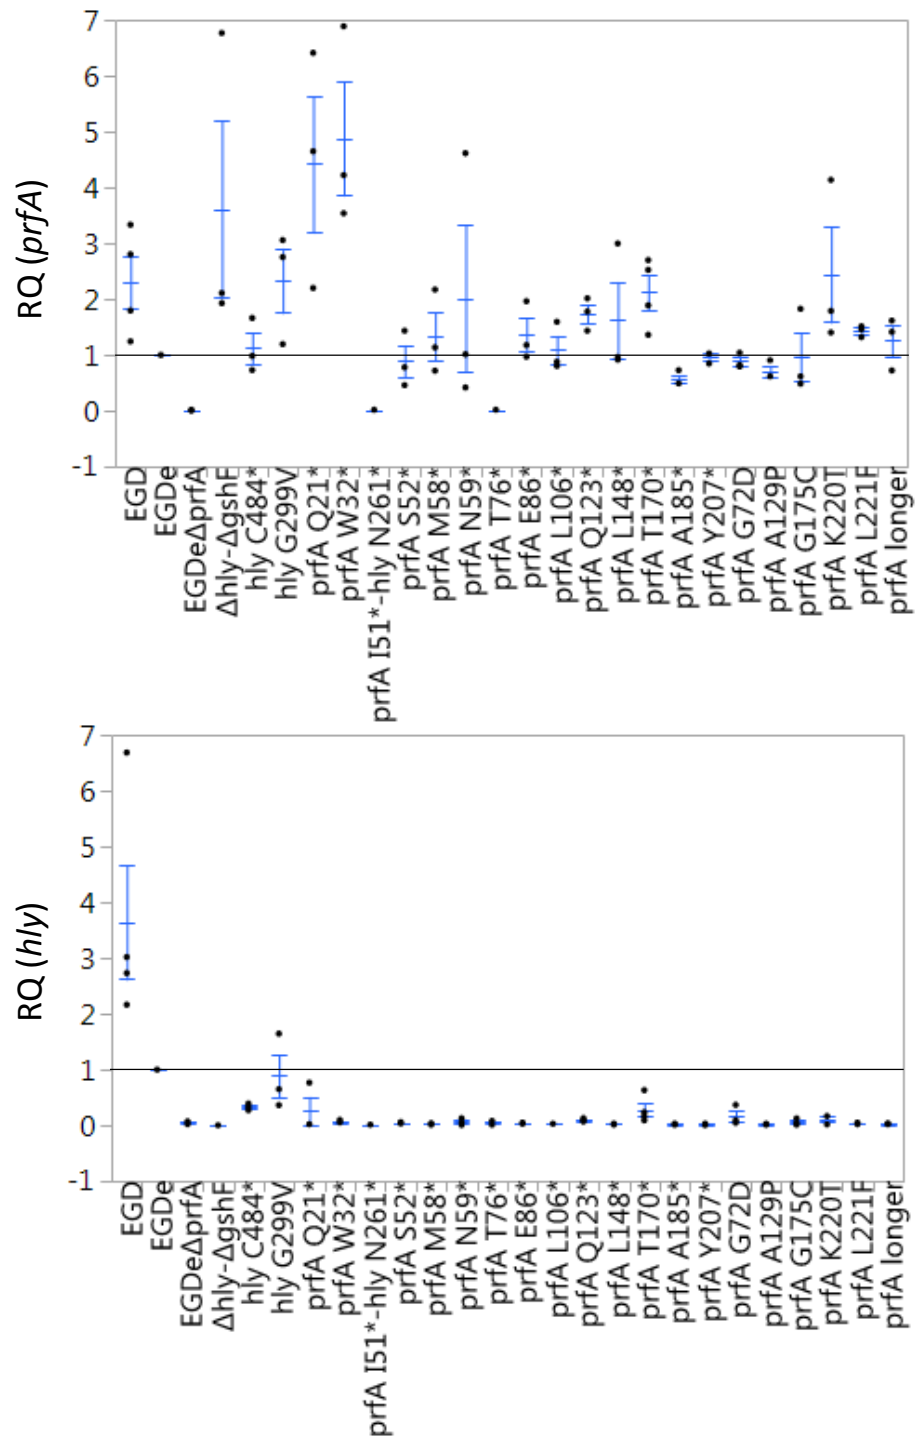

Supplement: IAI.00541-17_zii999092197s5.pdf [file IAI.00541-17_zii999092197s5.pdf]
