# Supplementary material for: Spontaneous Loss of Virulence in Natural Populations of Listeria monocytogenes
Source: PubMed Central journal article supplement (PMC5649026; doi:10.1128/iai.00541-17), 2017-10-18
Supplement: IAI.00541-17_zii999092197s6.pdf [file IAI.00541-17_zii999092197s6.pdf]

1 **Supplementary figure 1: Fitness analyzes of the non-hemolytic strains.**

2 Growth analyzes of all non-hemolytic strains were performed in BHI at 22°C (A) and 37°C  
3 (B). Areas under the growth curves (AUC) were calculated for each strain using the “gcFit”  
4 function of the “grofit” R package v.1.1.1-1. AUC values are shown for each strain (being  
5 represented by one black dot) per type of loss-of-hemolysis mutation. Each central bar  
6 represents the mean of at least three replications. Error bars indicate standard deviations from  
7 the means. Horizontal black lines indicate the AUC values obtained for EGDe. Black circles  
8 surround strains that show the most impaired growth.

9

10 **Supplementary figure 2: Assessment of PrfA activity.**

11 PrfA activity was assessed using, as reporter, the lecithinase activity of PlcB on egg yolk BHI  
12 agar plates both in PrfA-non-activating (without charcoal, left) and -activating conditions  
13 (with 0.5% w/v activated charcoal, right). Two time points are shown: 24 h (above) and 48 h  
14 (below). *prfA*<sub>WT</sub>: P14<sub>WT</sub> ;  $\Delta$ *prfA*: P14 $\Delta$ *prfA*; *prfA*\*: P14*prfA*\*; 1: CLIP 2008/01432; 2: CLIP  
15 1996/70860; 3: CLIP 2001/89406; 4: CLIP 2008/01435; 5: CLIP 2001/89407. Positions of the  
16 strains are identical in all pictures. All non-hemolytic strains showed similar activity profiles  
17 as strains 1 to 5.

18

19 **Supplementary figure 3: Quantification of *prfA* and *hly* transcripts for a representative**  
20 **set of non-hemolytic strains.**

21 Fold change of *prfA* (above) and *hly* (below) transcription relative to EGDe (Relative  
22 quantities, RQs) are shown for a representative set of non-hemolytic strains (**Table S1**, one  
23 strain per type of loss-of-hemolysis mutation). *prfA* and *hly* expression levels were  
24 normalized according to *gyrB* expression. Each central bar represents the mean of at least

25 three replications. Error bars indicate standard deviations from the means. Horizontal black  
26 lines indicate the RQs of 1 on the y-axes.

27

28 **Supplementary Table 1: Characteristics and amino-acid modifications identified in PrfA**  
29 **and LLO for the 60 non-hemolytic strains.**

30 Lineages, PCR serogroups, sequence types and clonal complexes (MLST) as well as cgMLST  
31 types were deduced from genome sequences using the BIGSdb-*Lm* platform  
32 (<http://bigsdB.pasteur.fr/listeria>). All genome assemblies are publicly available in the BIGSdb-  
33 *Lm* platform using the identifiers listed in the first column. Assemblies of both Illumina and  
34 PacBio reads are made available for the CLIP 1998/76801 strain. Positions of amino-acid  
35 substitutions and stop codons in PrfA and LLO are indicated. Stop codons are indicated with  
36 black stars and highlighted in blue; amino acid substitutions are highlighted in orange. No  
37 *bglA* allele could be deduced based on the Illumina reads of the CLIP 2004/96369 strain, and  
38 no ST could therefore be assigned, but a clonal complex could be deduced based on the 6  
39 other MLST alleles. Strains used for the quantification of *hly* and *prfA* transcripts are notified  
40 in the “Used in *hly* and *prfA* qRT-PCR assays” column.

41

42 **Supplementary table 2: Primers used in this study.**

43 All primers used for *hly* complementation in a EGDΔ*hly* background (EGDΔ*hly*:pPL2-*hly*<sub>WT</sub>,  
44 EGDΔ*hly*:pPL2-*hly*<sub>G299V</sub> and EGDΔ*hly*:pPL2-*hly*<sub>C484\*</sub> constructs) as well as the primers used  
45 for qPCR assays are listed. Restriction enzymes recognition sites are underlined.

46
